# Supplementary material for: Indocyanine green binds to DOTAP liposomes for enhanced optical properties and tumor photoablation
Source: Royal Society of Chemistry journal article supplement (doi:10.1039/c9bm00551j), 2019-01-01
Supplement: c9bm00551j1.pdf [file c9bm00551j1.pdf]

## Supporting Information: Indocyanine Green Binds to DOTAP Liposomes for Enhanced Optical Properties and Tumor Photoablation

Dyego Miranda<sup>a</sup>, Chao Wan<sup>b</sup>, Hailey I Kilian<sup>a</sup>, Moustafa T. Mabrouk<sup>a</sup>, Yuhao Zhou<sup>b</sup>, Honglin Jin<sup>\*b</sup>, Jonathan F Lovell<sup>\*a</sup>

<sup>a</sup>Department of Biomedical Engineering, University at Buffalo, State University of New York, Buffalo, NY 14260, USA

<sup>b</sup>Cancer Center, Union Hospital, Tongji Medical College, Huazhong University of Science and Technology, Wuhan 430022, China.

\*Correspondence: [jflorell@buffalo.edu](mailto:jflorell@buffalo.edu) or [jjin@hust.edu.cn](mailto:jjin@hust.edu.cn)

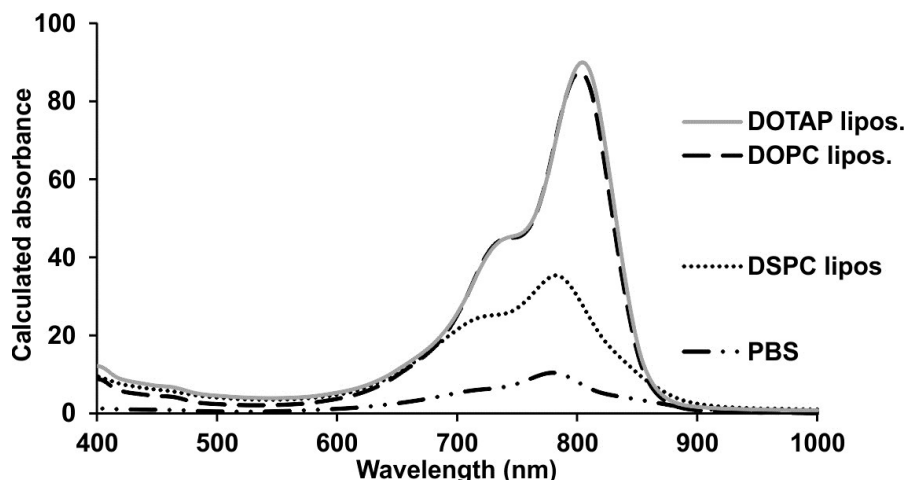

**Figure S1** Calculated absorption (ie. Absorption times dilution factor, which was 100) of ICG (0.5 mg/mL) following mixing with indicated liposomes or PBS.

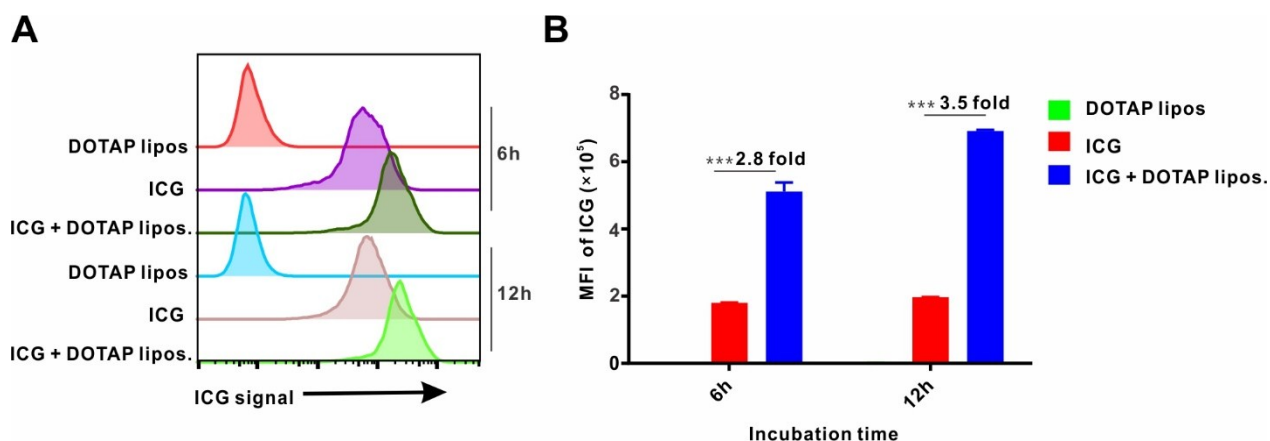

**Figure S2** Uptake of ICG in 4T1 cells monitored by flow cytometry. A) Histograms of cell ICG fluorescence following incubation of indicated samples for 6 or 12 hours. B) Quantification of mean fluorescence intensity at indicated time points for n=3 independent incubations.
